# Supplementary material
Source: HighWire-hosted journal article supplement (http://molpharm.aspetjournals.org/highwire/filestream/76831/field_highwire_adjunct_files/1/supplemental_figure_1_for_pub.pdf)
Supplement: supplemental_figure_1_for_pub.pdf [file supplemental_figure_1_for_pub.pdf]

Judith A. Enyeart, Haiyan Liu, and John J. Enyeart

cAMP Analogs and Their Metabolites Enhance TREK-1 mRNA and K<sup>+</sup> Current Expression in Adrenocortical Cells  
MOLECULAR PHARMACOLOGY

### SUPPLEMENTAL FIGURE 1

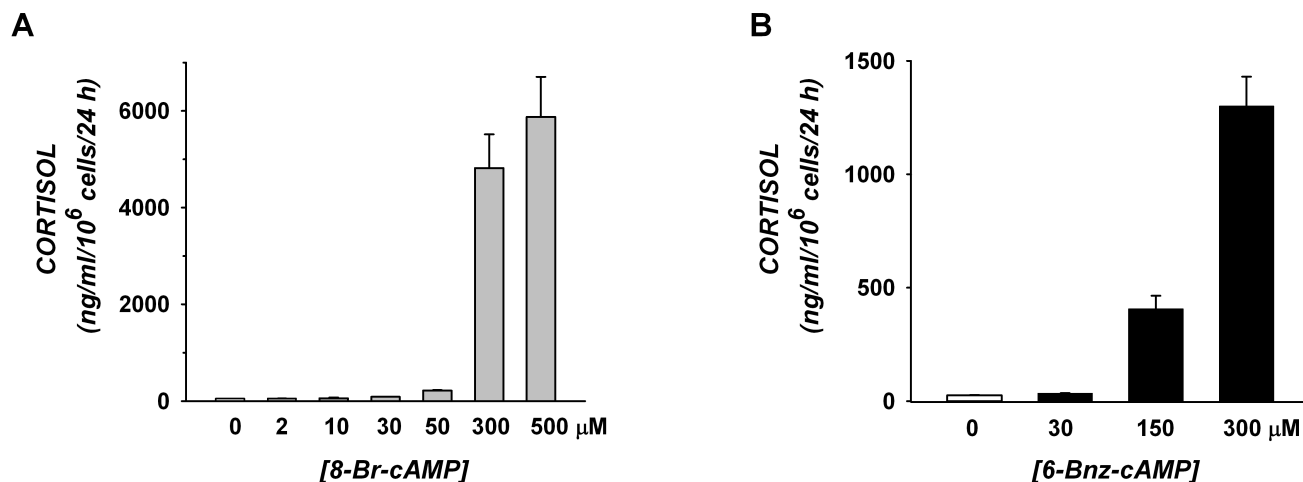

*Supplemental Figure 1. Effects of 8-Br-cAMP and 6-Bnz-cAMP on cortisol secretion.* For cortisol determination, bovine AZF cells were plated as described in the Methods. After 24 h, medium was aspirated and replaced with the same medium either without (control) or with 8-Br-cAMP or 6-Bnz-cAMP as indicated. Cortisol was measured in duplicate from duplicate experimental media samples using a Cortisol EIA (DSL-10-200) from Diagnostic Systems Laboratories (Webster, TX), according to the manufacturer's directions. If necessary, media samples were diluted using DMEM/F12+. A) Cortisol concentration from media was determined after 24 h with no addition or after addition of 8-Br-cAMP (2-500 μM, grey bars). B) Cortisol concentration from AZF cell media was determined after 24 h with no addition or after addition of 6-Bnz-cAMP (30-300 μM, black bars).
